# Supplementary material for: Substituent effects in nucleophiles on activation parameters in the bimolecular nucleophilic reactions in solution
Source: Royal Society of Chemistry journal article supplement (doi:10.1039/c0nj00058b), 2010-01-01
Supplement: c0nj00058b.pdf [file c0nj00058b.pdf]

**Table S1** Parameters of equations  $\Delta H^\ddagger = \delta\Delta H^\ddagger\sigma + \Delta H^\ddagger_0$ ,  $\Delta S^\ddagger = \delta\Delta S^\ddagger\sigma + \Delta S^\ddagger_0$ , and  $\Delta G^\ddagger = \delta\Delta G^\ddagger\sigma + \Delta G^\ddagger_0$  for the reactions of compounds **9** - **32** with nucleophiles **1**– **8**.

| Ent-<br>ry | Reactants                                                                                                                    | N <sup>a</sup> | $\delta\Delta H^\ddagger/kJ mol^{-1}$<br>$\sigma^{-1}$ <sup>b,c</sup> | $\Delta H^\ddagger_0/kJ mol^{-1}$ | <i>r</i><br>( <i>s</i> ) | $\delta\Delta S^\ddagger/J mol^{-1} K^{-1}$<br>$\sigma^{-1}$ <sup>b,c</sup> | $\Delta S^\ddagger_0/J mol^{-1} K^{-1}$ | <i>r</i><br>( <i>s</i> ) | $\delta\Delta G^\ddagger/kJ mol^{-1}$<br>$\sigma^{-1}$ <sup>b,c</sup> | $\Delta G^\ddagger_0/kJ mol^{-1}$ | <i>r</i><br>( <i>s</i> ) | Ref.         |
|------------|------------------------------------------------------------------------------------------------------------------------------|----------------|-----------------------------------------------------------------------|-----------------------------------|--------------------------|-----------------------------------------------------------------------------|-----------------------------------------|--------------------------|-----------------------------------------------------------------------|-----------------------------------|--------------------------|--------------|
|            |                                                                                                                              |                |                                                                       |                                   | <u>S<sub>N</sub>2</u>    | <u>reactions</u>                                                            |                                         |                          |                                                                       |                                   |                          |              |
| 1          | RC <sub>6</sub> H <sub>4</sub> NMe <sub>2</sub><br><b>1b,c,f,h,i,j,s,t</b><br>+ MeI <b>9</b>                                 | 8              | 16.4 ± 1.1                                                            | 61.1 ± 0.2                        | 0.987<br>(0.42)          | 7.0                                                                         | -121.3                                  | -                        | 14.1 ± 0.6                                                            | 100.9 ±<br>0.1                    | 0.995<br>(0.22)          | 30,47,<br>49 |
| 2          | RC <sub>6</sub> H <sub>4</sub> NMe <sub>2</sub><br><b>1c,f,h,m,z</b><br>+ MeI <b>9</b>                                       | 5              | 10.0 ± 0.6                                                            | 48.8 ± 0.2                        | 0.994<br>(0.44)          | -14.2 ± 1.2                                                                 | -152.3 ± 0.4                            | 0.989<br>(0.88)          | 14.4 ± 0.3                                                            | 96.5 ± 0.1                        | 0.999<br>(0.22)          | 30,47,<br>50 |
| 3          | RC <sub>6</sub> H <sub>4</sub> NMe <sub>2</sub><br><b>1c,f,h,m,z</b><br>+ MeI <b>9</b>                                       | 5              | 9.8 ± 0.5 <sup>d</sup>                                                | 45.9 ± 0.2                        | 0.997<br>(0.38)          | -15.1 ± 1.4                                                                 | -166.8 ± 0.5                            | 0.991<br>(0.99)          | 14.6 ± 0.1                                                            | 98.15 ±<br>0.03                   | 0.999<br>(0.07)          | 30,47,<br>50 |
| 4          | RC <sub>5</sub> H <sub>4</sub> N<br><b>2h,m,o,p,w</b><br>+ MeI <b>9</b>                                                      | 5              | 9.9 ± 1.7                                                             | 53.7 ± 0.8                        | 0.959<br>(1.0)           | -10.7                                                                       | -130.9                                  | -                        | 13.1 ± 1.3                                                            | 92.7 ± 0.6                        | 0.986<br>(0.74)          | 30,47,<br>51 |
| 5          | RC <sub>6</sub> H <sub>4</sub> NH <sub>2</sub><br><b>3b,c,e,h,j</b><br>+ CH <sub>2</sub> =CH-CH <sub>2</sub> Br<br><b>10</b> | 5              | -20.9                                                                 | 42.9                              | -                        | -88.8 ± 13.3                                                                | -152.1 ± 2.4                            | 0.968<br>(5.4)           | 6.0 ± 0.2                                                             | 89.0 ± 0.1                        | 0.998<br>(0.1)           | 47,52        |
| 6          | RC <sub>6</sub> H <sub>4</sub> NH <sub>2</sub><br><b>3c,h,j,m</b><br>+ PhCH <sub>2</sub> Br<br><b>11</b>                     | 4              | -1.9                                                                  | 29.0                              | -                        | -35.4 ± 3.2 <sup>e</sup>                                                    | -197.8 ± 0.9                            | 0.995<br>(1.3)           | 9.0 ± 0.2                                                             | 89.9 ± 0.1                        | 0.999<br>(0.1)           | 47,53        |
| 7          | RC <sub>6</sub> H <sub>4</sub> NH <sub>2</sub><br><b>3b,c,h,j,m</b><br>+ PhCH <sub>2</sub> Cl<br><b>12</b>                   | 5              | -0.6                                                                  | 40.0                              | -                        | -25.8 ± 0.5 <sup>f</sup>                                                    | -205.3 ± 0.1                            | 0.999<br>(0.23)          | 7.9 ± 0.2                                                             | 105.3 ±<br>0.1                    | 0.999<br>(0.10)          | 47,53        |
| 8          | RC <sub>6</sub> H <sub>4</sub> NH <sub>2</sub><br><b>3c,f,h,j,k,m,n</b><br>+ PhCH <sub>2</sub> Br<br><b>11</b>               | 7              | 8.0 ± 0.9 <sup>g</sup>                                                | 50.2 ± 0.3                        | 0.981<br>(0.55)          | 7.9                                                                         | -132.0                                  | -                        | 5.6 ± 1.0                                                             | 90.2 ± 0.3                        | 0.925<br>(0.67)          | 47,54        |
| 9          | RC <sub>6</sub> H <sub>4</sub> NH <sub>2</sub><br><b>3c,h,k,n,z</b><br>+ PhCH <sub>2</sub> Br<br><b>11</b>                   | 5              | 7.7 ± 2.0                                                             | 45.8 ± 0.9                        | 0.911<br>(1.5)           | -0.3                                                                        | -171.3                                  | -                        | 7.8 ± 1.8                                                             | 97.7 ± 0.8                        | 0.925<br>(1.4)           | 47,54        |

|    |                                                                                                                                                                             |        |                          |                |                                          |                                              |              |                 |                          |                |                 |              |
|----|-----------------------------------------------------------------------------------------------------------------------------------------------------------------------------|--------|--------------------------|----------------|------------------------------------------|----------------------------------------------|--------------|-----------------|--------------------------|----------------|-----------------|--------------|
| 10 | RC <sub>6</sub> H <sub>4</sub> S <sup>+</sup> Na <sup>-</sup><br><b>4c,h,j,y</b><br>+ PhSO <sub>2</sub> CH=CCl <sub>2</sub><br><b>13</b>                                    | 4      | 12.5 ± 4.6 <sup>h</sup>  | 58.5 ± 3.0     | <u>S<sub>N</sub>V</u><br>0.900<br>(5.2)  | <u>reactions</u><br>37.1 ± 13.8 <sup>h</sup> | -52.8 ± 8.9  | 0.900<br>(15.5) | 1.7 ± 0.3 <sup>h</sup>   | 74.1 ± 0.2     | 0.973<br>(0.30) | 55           |
| 11 | RC <sub>6</sub> H <sub>4</sub> CH <sub>2</sub> NH <sub>2</sub><br><b>5b-f,h-m,v,z</b><br>+ PhCH=C(CN) <sub>2</sub><br><b>14</b>                                             | 1<br>3 | 21.8 ± 2.1               | 45.4 ± 0.6     | <u>Ad<sub>N</sub></u><br>0.982<br>(0.43) | <u>reactions</u><br>48.8                     | -86.7        | -               | 7.5 ± 0.3                | 70.8 ± 0.1     | 0.982<br>(0.44) | 56           |
| 12 | RC <sub>6</sub> H <sub>4</sub> NH <sub>2</sub><br><b>3b-f,h,j,k,m,p,u-z</b><br>+ (E)-<br>PhCH=CHNO <sub>2</sub><br><b>15</b>                                                | 1<br>5 | 16.0 ± 1.6               | 45.1 ± 0.7     | 0.940<br>(2.0)                           | 18.1                                         | -154.4       | -               | 10.6 ± 0.6               | 91.1 ± 0.3     | 0.977<br>(0.78) | 57           |
| 13 | RC <sub>6</sub> H <sub>4</sub> NH <sub>2</sub><br><b>3a-f,h,j,k</b><br>+ PhC≡C-C(O)Ph<br><b>16</b>                                                                          | 1<br>0 | -3.4                     | 157.4          | -                                        | -44.7 ± 6.2                                  | -187.3 ± 2.3 | 0.930<br>(6.6)  | 10.6 ± 1.3               | 98.8 ± 0.5     | 0.947<br>(1.36) | 58           |
| 14 | RC <sub>6</sub> H <sub>4</sub> SH·Et <sub>3</sub> N<br><b>6b,c,h,j,y</b><br>+ hC≡C-C(O)Ph<br><b>16</b>                                                                      | 5      | 0                        | 0              | -                                        | 46.9 ± 1.5 <sup>h</sup>                      | -277.2 ± 0.9 | 0.998<br>(1.9)  | -12.7 ± 0.5 <sup>h</sup> | 75.5 ± 0.3     | 0.998<br>(0.6)  | 59           |
| 15 | RC <sub>6</sub> H <sub>4</sub> O <sup>+</sup> Na <sup>-</sup><br><b>7b,c,f,h,j,k,v,y</b><br>+ 2-Cl-5-<br>NO <sub>2</sub> C <sub>5</sub> H <sub>3</sub> N<br><b>17</b>       | 8      | 34.5 ± 3.3               | 57.7 ± 1.2     | <u>S<sub>N</sub>Ar</u><br>0.974<br>(3.0) | <u>reactions</u><br>77.1 ± 9.6               | -124.7 ± 3.4 | 0.956<br>(8.8)  | 8.1 ± 0.4                | 100.5 ±<br>0.1 | 0.993<br>(0.36) | 36,60        |
| 16 | RC <sub>6</sub> H <sub>4</sub> O <sup>+</sup> Na <sup>-</sup><br><b>7b,c,f,h,j,k,v,y</b><br>+ 2-Cl-3-<br>NO <sub>2</sub> C <sub>5</sub> H <sub>3</sub> N<br><b>18</b>       | 8      | 34.3 ± 3.7               | 70.8 ± 1.3     | 0.966<br>(3.4)                           | 85.0 ± 12.2                                  | -98.9 ± 4.3  | 0.943<br>(11.2) | 5.1 ± 0.6                | 104.7 ±<br>0.2 | 0.963<br>(0.54) | 36,60        |
| 17 | RC <sub>6</sub> H <sub>4</sub> OH·K <sub>2</sub> CO <sub>3</sub><br><b>8c,g,h,j,k,y</b><br>+ 1,3-(NO <sub>2</sub> ) <sub>2</sub> C <sub>6</sub> H <sub>4</sub><br><b>19</b> | 6      | -77.2 ± 0.4 <sup>h</sup> | 214.7 ±<br>0.1 | 0.999<br>(0.29)                          | -213.8 ± 0.3 <sup>h</sup>                    | 203.7 ± 0.1  | 0.999<br>(0.21) | 13.2 ± 0.3 <sup>h</sup>  | 128.5 ±<br>0.1 | 0.999<br>(0.30) | 36,61,<br>62 |
| 18 | RC <sub>6</sub> H <sub>4</sub> OH·K <sub>2</sub> CO <sub>3</sub><br><b>8c,h,j,y</b><br>+ 3-NO <sub>2</sub> C <sub>6</sub> H <sub>4</sub> F                                  | 4      | -86.3 ± 1.7 <sup>h</sup> | 204.7 ±<br>0.6 | 0.999<br>(1.12)                          | -238.1 ± 2.7 <sup>h</sup>                    | 175.2 ± 1.0  | 0.999<br>(1.78) | 14.4 ± 0.7 <sup>h</sup>  | 130.6 ±<br>0.3 | 0.998<br>(0.43) | 36,61,<br>62 |



|    |                                                                                                                                                                                   |   |              |                              |                 |             |                          |                 |            |                |                 |       |
|----|-----------------------------------------------------------------------------------------------------------------------------------------------------------------------------------|---|--------------|------------------------------|-----------------|-------------|--------------------------|-----------------|------------|----------------|-----------------|-------|
| 28 | RC <sub>6</sub> H <sub>4</sub> NH <sub>2</sub><br><b>3c,f,j,h,m,z</b><br>+ 2-C <sub>4</sub> H <sub>3</sub> O-<br>CH=CH-COCl<br><b>29</b>                                          | 6 | 16.2 ± 1.1   | 24.9 ± 0.4                   | 0.990<br>(0.83) | -6.4        | -178.5                   | -               | 18.1 ± 0.6 | 78.1 ± 0.2     | 0.998<br>(0.41) | 69    |
| 29 | RC <sub>6</sub> H <sub>4</sub> NH <sub>2</sub><br><b>3c,f,j,h,m,z</b><br>+ 2-C <sub>4</sub> H <sub>3</sub> S-<br>CH=CH-COCl<br><b>30</b>                                          | 6 | 16.8 ± 0.8   | 25.8 ± 0.3                   | 0.995<br>(0.61) | -2.3        | -178.8                   | -               | 17.5 ± 0.4 | 78.5 ± 0.2     | 0.999<br>(0.32) | 69    |
| 30 | RC <sub>6</sub> H <sub>4</sub> NH <sub>2</sub><br><b>3b,c,f,h,j,m,z</b><br>+ 3-C <sub>4</sub> H <sub>3</sub> S-COCl<br><b>31</b>                                                  | 7 | 17.5 ± 0.7   | 28.4 ± 0.2                   | 0.995<br>(0.55) | -2.0        | -173.8                   | -               | 18.1 ± 0.7 | 80.2 ± 0.2     | 0.996<br>(0.55) | 70    |
| 31 | RC <sub>6</sub> H <sub>4</sub> OH·K <sub>2</sub> CO <sub>3</sub><br><b>8b,c,f</b><br>+ PhC(O)OC <sub>6</sub> H <sub>3</sub><br>-(NO <sub>2</sub> ) <sub>2</sub> -2,4<br><b>32</b> | 3 | -0.25 ± 0.03 | 1.71 ±<br>0.01 <sup>i</sup>  | 0.993<br>(0.01) | -34.0 ± 1.2 | 3.09 ± 0.22 <sup>i</sup> | 0.999<br>(1.15) | 9.7        | 0 <sup>i</sup> | -               | 35,71 |
| 32 | RC <sub>6</sub> H <sub>4</sub> OH·K <sub>2</sub> CO <sub>3</sub><br><b>8j,p,z</b><br>+ PhC(O)OC <sub>6</sub> H <sub>3</sub><br>-(NO <sub>2</sub> ) <sub>2</sub> -2,4<br><b>32</b> | 3 | -10.2 ± 0.3  | 1.06 ±<br>0.13 <sup>i</sup>  | 0.999<br>(0.10) | -40.1 ± 0.9 | 17.7 ± 0.4 <sup>i</sup>  | 0.999<br>(0.32) | 1.5        | 0 <sup>i</sup> | -               | 35,71 |
| 33 | RC <sub>6</sub> H <sub>4</sub> OH·K <sub>2</sub> CO <sub>3</sub><br><b>8w,y,z</b><br>+ PhC(O)OC <sub>6</sub> H <sub>3</sub><br>-(NO <sub>2</sub> ) <sub>2</sub> -2,4<br><b>32</b> | 3 | -7.0 ± 0.04  | -1.25 ±<br>0.04 <sup>i</sup> | 0.999<br>(0.02) | -45.5 ± 0.2 | 21.5 ± 0.2 <sup>i</sup>  | 0.999<br>(0.09) | 6.3        | 0 <sup>i</sup> | -               | 35,71 |

<sup>a</sup> Number of compounds. <sup>b</sup>  $\sigma$  constants<sup>12</sup> were used in the correlations; standard errors of the  $\delta\Delta H^\ddagger$ ,  $\delta\Delta S^\ddagger$  and  $\delta\Delta G^\ddagger$  reaction constants are estimated to be less than 9%, 12% and 7%, respectively. <sup>c</sup> Values given without correlation coefficient are calculated by the equation  $\delta\Delta G^\ddagger = \delta\Delta H^\ddagger - T \delta\Delta S^\ddagger$ . <sup>d</sup> Value is calculated for compounds **1c,f,h,z**. <sup>e</sup> Value is calculated for compounds **3c,j,m**. <sup>f</sup> Value is calculated for compounds **3b,c,h,m**. <sup>g</sup> Value is calculated for compounds **3c,f,j,k,n**. <sup>h</sup> Value is calculated for compounds **3b,e,p**. <sup>i</sup> The differences in the activation parameters  $\Delta\Delta H_0^\ddagger = \Delta H_0^\ddagger(\text{R}) - \Delta H_0^\ddagger(\text{H})$ ,  $\Delta\Delta S_0^\ddagger = \Delta S_0^\ddagger(\text{R}) - \Delta S_0^\ddagger(\text{H})$ , and  $\Delta\Delta G_0^\ddagger = \Delta G_0^\ddagger(\text{R}) - \Delta G_0^\ddagger(\text{H})$ , respectively.
